# Supplementary material
Source: PubMed Central journal article supplement (PMC1783418)

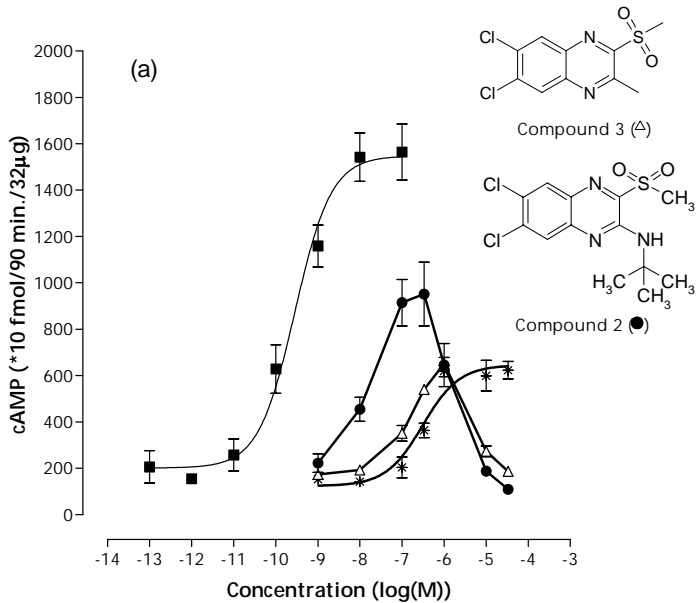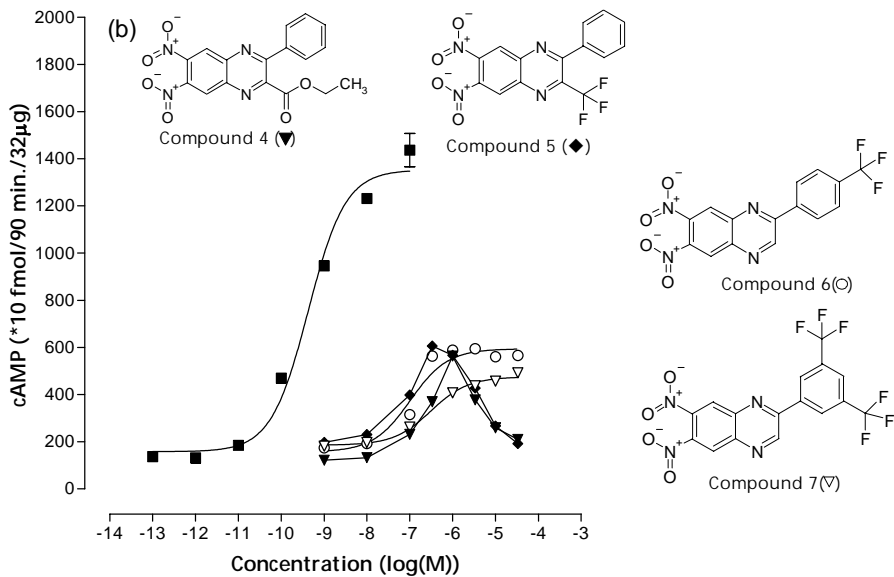

Supplement: pnas_0605701104_1.pdf [file pnas_0605701104_1.pdf]

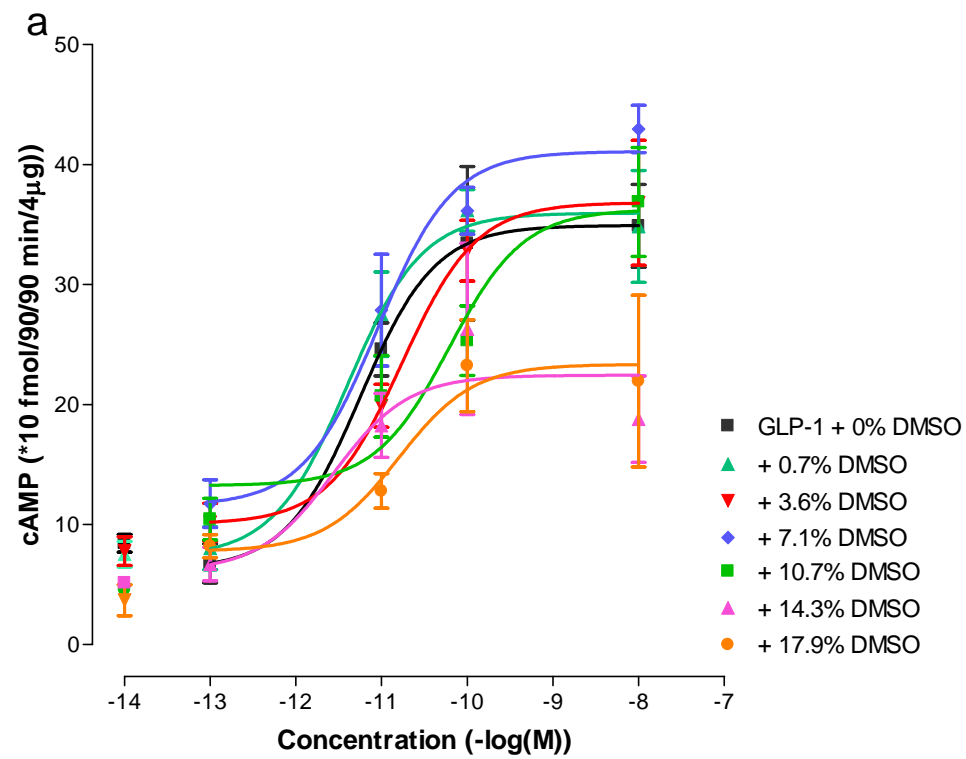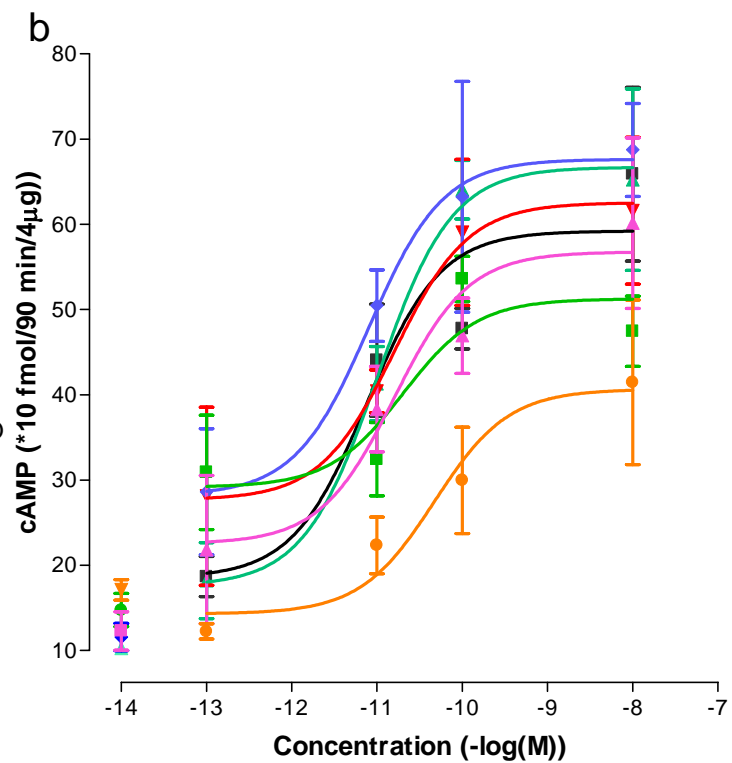

Supplement: pnas_0605701104_2.pdf [file pnas_0605701104_2.pdf]

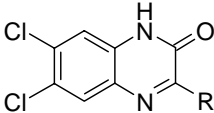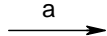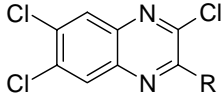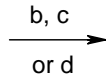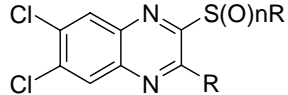

**1, 3**

Supplement: pnas_0605701104_3.pdf [file pnas_0605701104_3.pdf]

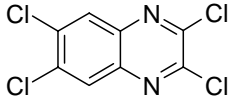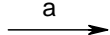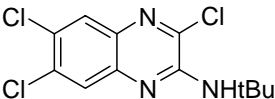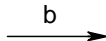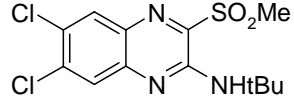

**2**

Supplement: pnas_0605701104_4.pdf [file pnas_0605701104_4.pdf]

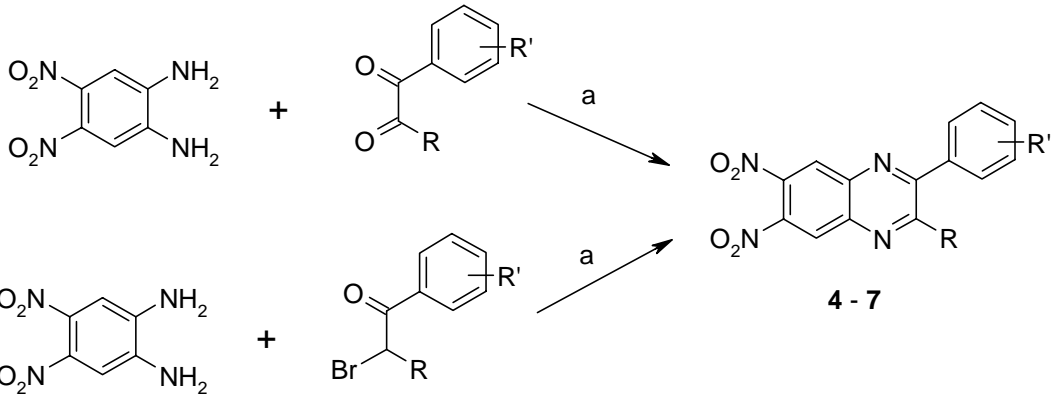

Supplement: pnas_0605701104_5.pdf [file pnas_0605701104_5.pdf]
